# Supplementary material
Source: ML conference proceedings conference paper supplement (https://aclanthology.org/2020.wmt-1.71)
Supplement: OptionalSupplementaryMaterial [file WMT_2020___Document_level_Neural_Machine_Translation_appendix.pdf › WMT_2020___Document_level_Neural_Machine_Translation_appendix.pdf]

## A Appendices

Here we provide some translation examples of sentence-level baseline and context-aware model for OpenSubtitles and WMT news-headlines.

|                |                                                             |
|----------------|-------------------------------------------------------------|
| Context        | Make yourself comfortable.                                  |
| Source         | I will check in on you later.                               |
| Reference      | Ich sehe später nach Ihnen.                                 |
| Sent-level pre | Machen <b>Sie</b> es sich bequem.                           |
| Sent-level cur | Ich sehe später nach <b>dir</b> .                           |
| Doc-level pre  | Machen <b>Sie</b> es sich bequem.                           |
| Doc-level cur  | Ich sehe später nach <b>Ihnen</b> .                         |
| Context        | He is never spent the night with a woman before.            |
| Source         | A woman?                                                    |
| Reference      | Einer Frau?                                                 |
| Sent-level pre | Er hat noch nie die Nacht mit <b>einer</b> Frau verbracht.  |
| Sent-level cur | <b>Eine</b> Frau?                                           |
| Doc-level pre  | Er hat noch nie mit <b>einer</b> Frau geschlafen.           |
| Doc-level cur  | <b>Einer</b> Frau?                                          |
| Context        | I curse the fucking day you were born!                      |
| Source         | I curse it!                                                 |
| Reference      | Ich verfluche ihn!                                          |
| Sent-level pre | Ich verfluche <b>den</b> Tag, an dem du geboren wurdest!    |
| Sent-level cur | Ich verfluche <b>es</b> !                                   |
| Doc-level pre  | Ich verfluche <b>den</b> Tag, an dem du geboren wurdest!    |
| Doc-level cur  | Ich verfluche <b>ihn</b> !                                  |
| Context        | Where is what? I do not even know what you are looking for. |
| Source         | Yes, you do.                                                |
| Reference      | - Doch, das wissen Sie.                                     |
| Sent-level pre | Ich <b>weiß</b> nicht mal, wonach du suchst.                |
| Sent-level cur | Doch, das <b>tuest</b> du.                                  |
| Doc-level pre  | Ich <b>weiß</b> nicht mal, wonach Sie suchen.               |
| Doc-level cur  | Doch, das <b>wissen</b> Sie.                                |

Table 8: Positive example translations in OpenSubtitles.

Table 8 provides some positive cases that the best performing context-aware model, Single Encoder (2to2), utilizes the source- and target- side context to make the translations more consistent, while Table 9 shows one improved example by the context-aware model where the context is not clearly useful:

|                |                                           |
|----------------|-------------------------------------------|
| Context        | Someone must have really wanted her ring. |
| Source         | Her nail beds are pink.                   |
| Reference      | Ihre Nagelbetten sind rosa.               |
| Sent-level cur | Ihre Nagelbetten sind <b>pink</b> .       |
| Doc-level cur  | Ihre Nagelbetten sind <b>rosa</b> .       |

Table 9: One improved example in OpenSubtitles that is not easily interpretable.

Table 10 gives some examples of news-headlines translation in WMT where the context is just a special token denoting that the next sentence should

|                |                                                                        |
|----------------|------------------------------------------------------------------------|
| Context        | BOUNDARY_TOKEN                                                         |
| Source         | We 're making the city liveable.                                       |
| Reference      | Wir machen die Stadt lebenswert.                                       |
| Sent-level cur | Wir stellen die lebensfähige Stadt.                                    |
| Doc-level cur  | Wir machen die Stadt lebensfähig.                                      |
| Context        | BOUNDARY_TOKEN                                                         |
| Source         | Tumlingen is celebrating 750 years of the St. Hilarius Church.         |
| Reference      | Tumlingen feiert 750 Jahre St. Hilarius-Kirche.                        |
| Sent-level cur | Tumlingen ist die Feier von 750 Jahren der St. Hilarius Kirche.        |
| Doc-level cur  | Tumlingen feiert 750 Jahre der St. Hilarius Kirche.                    |
| Context        | BOUNDARY_TOKEN                                                         |
| Source         | Prince Henrik does not want a grave next to his wife.                  |
| Reference      | Prinz Henrik will kein Grab neben seiner Frau.                         |
| Sent-level cur | Prinz Henrik will keine große Verbindung zu seiner Frau.               |
| Doc-level cur  | Prinz Henrik will kein Grab neben seiner Frau.                         |
| Context        | BOUNDARY_TOKEN                                                         |
| Source         | Pasture fence project is fundamental.                                  |
| Reference      | Weidezaunprojekt ist elementar.                                        |
| Sent-level cur | Grundlegendes Projekt zur Wachstumsfoerderung ist das Projekt.         |
| Doc-level cur  | Ein grundlegendes Projekt.                                             |
| Context        | BOUNDARY_TOKEN                                                         |
| Source         | Collision with a car : Cyclist hurled onto the road.                   |
| Reference      | Kollision mit Auto: Radler wird auf Straße geschleudert.               |
| Sent-level cur | Die Kollision mit einem Auto: der Zyniker härtete sich auf die Straße. |
| Doc-level cur  | Die Kollision mit einem Auto.                                          |

Table 10: Example translations in WMT generated by sentence-level baseline and the best document-level mode, i.e., Multi-Encoders (In. Par.).

be a headline. As clearly seen, the translations generated by the context-aware model are generally shorter and in headline-style as expected.
